# Supplementary material
Source: PubMed Central journal article supplement (PMC5785462)
Supplement: NIHMS923497-supplement-1_Graphic_Abstract.pdf [file NIHMS923497-supplement-1_Graphic_Abstract.pdf]

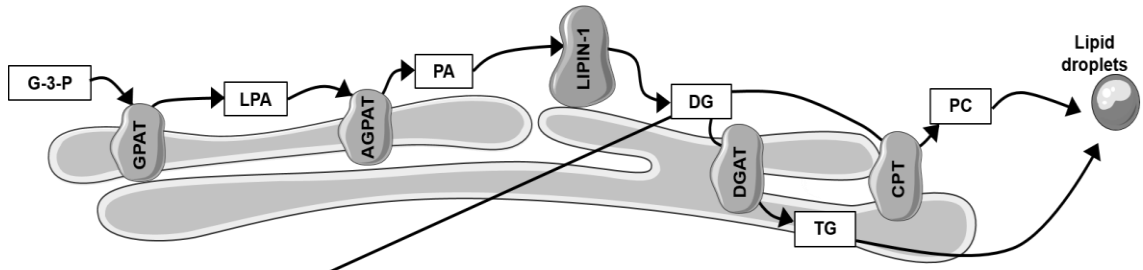

PKC $\alpha/\beta$ II  $\rightarrow$  ERK1/2  $\rightarrow$  cJun  $\rightarrow$  Priming of the macrophage for a pro-inflammatory response
