# Supplementary material
Source: PubMed Central journal article supplement (PMC5785462)
Supplement: NIHMS923497-supplement-3_MATERIAL_METHODS.pdf [file NIHMS923497-supplement-3_MATERIAL_METHODS.pdf]

## 1 SUPPLEMENTAL MATERIAL

### 2 MATERIALS & METHODS

3 **AAV8-PCSK9 viral vector preparation** – DNA for pAAV/D377Y-mPCSK9 (Addgene plasmid #58376),  
4 a gift from Jacob Bentzon<sup>1</sup> was packaged into adeno-associated virus serotype 8 (AAV8) using helper  
5 and capsid plasmids from the University of Pennsylvania.<sup>2, 3</sup> Viral stocks were sterilized via Millipore  
6 Millex-GV syringe filter (Billerica, MA), tittered by dot blot assay, aliquoted, and stored frozen until use.  
7 Final product will be referred to as AAV8-PCSK9.

8 **Animals and tissue harvest** – Animal protocols were approved by the LSU Health Sciences Center-  
9 Shreveport institutional animal care and use committee, and all animals were cared for according to the  
10 National Institute of Health guidelines for the care and use of laboratory animals. 6- to 8-week old,  
11 C57BL/6J mice were purchased from Jackson Laboratory (Bar Harbor, ME) and were used for the  
12 generation of bone marrow-derived macrophages (BMDMs) as described in the section titled  
13 “Generation of bone marrow-derived macrophages”. Mice harboring a *Lpin1* allele with exons 3 and 4  
14 of the *Lpin1* gene flanked by LoxP sites (genetic background: C57BL/6J and SV129) were generously  
15 provided by Brian Finck and Roman Chrast.<sup>4, 5</sup> To generate mice with the *Lpin1* gene selectively  
16 inactivated in myeloid-derived cells, the *Lpin1* floxed (lipin-1<sup>flox/flox</sup>) mice were mated with *LysM-Cre*  
17 transgenic mice purchased from Jackson Laboratory (Bar Harbor, ME). The resulting offspring were  
18 deficient in lipin-1 enzymatic activity within myeloid-derived cells (lipin-1<sup>mEnzyKO</sup>). Experimental lipin-  
19 1<sup>mEnzyKO</sup> mice were compared with lipin-1<sup>flox/flox</sup> littermate control mice; 8- to 10-week old mice were  
20 used for all studies. Mice were given retro-orbital injections of 3x10<sup>10</sup> vector genomes of AAV8-PCSK9.  
21 Immediately following the AAV8-PCSK9 injection the mice were switched to a high fat, Western diet  
22 (TD 88137; Harlan-Teklad, Madison, WI) that contained 21% fat by weight (0.15% cholesterol and  
23 19.5% casein without sodium cholate) for 8 or 12 weeks before euthanasia. Mice were weighed once a  
24 week after starting high fat diet. After 8 or 12 weeks on high fat diet, mice were euthanized by  
25 exsanguination and pneumothorax under isoflurane anesthesia. Blood was collected by vena cava  
26 puncture into heparinized blood collection tubes, centrifuged at 5,000 rpm for 5 minutes, and plasma  
27 was isolated and frozen at -80°C until analysis. Following blood collection, mice were perfused with 1X  
28 phosphate-buffered saline (PBS), the heart and aorta were fixed in 4% neutral buffered formaldehyde  
29 for analysis, and additional tissue (heart and lung) was collected for Western blot or flow cytometric  
30 analysis.

31 **Plaque & Blood Analysis** – Aortas were harvested, cleaned of adventitia, cut open longitudinally,  
32 stained using 0.5% Oil Red O (Sigma Aldrich) prepared in 60% isopropanol, and pinned open. Vessels  
33 were visualized on a DS-Fil camera (Nikon) attached to a multizoom AZ100 microscope (Nikon), and  
34 plaque burden was analyzed using Nikon Elements software and expressed as a percentage of total  
35 aortic area. Total and HDL cholesterol (Wako) and triglyceride levels (Pointe Scientific) were measured  
36 using commercially available kits. LDL was calculated using the Friedewald equation.

37 **Histology and Image Quantification** – Aortic roots were fixed in 4% neutral buffered formaldehyde,  
38 embedded in paraffin, and cut into 5 µm sections. All sections were taken from the same site at equal  
39 distance from anatomical landmarks (initiation of valve leaflets). Russell-Movat Pentachrome staining  
40 was performed to determine plaque area. Images were collected using an Olympus BX40 microscope  
41 and quantification of the lesion area inside the internal elastic lamina was determined using Nikon  
42 Elements imaging software.

43 **Immunofluorescence** – Aortic roots were fixed in 4% neutral buffered formaldehyde for 24  
44 hours and then processed for paraffin embedding. Paraffin blocks were sectioned into 5 µm  
45 sections. All sections within each regimen were taken from the same site at equal distance  
46 from anatomical landmark (initiation of valve leaflets). Tissue sections were rehydrated and

47 antigen retrieval was performed in 10 mM citrate buffer (0.1M citric acid and 0.1M sodium  
48 citrate) using a microwave oven. Sections were blocked in blocking buffer (1% bovine serum  
49 albumin (BSA) in phosphate-buffered saline (PBS)) for at least one hour at room temperature.  
50 Sections were rinsed with Tris-buffered saline with 0.1% Tween 20 (TBST) three times.  
51 Primary antibodies were added and kept at 4°C overnight. Sections were again rinsed with  
52 three washes of TBST. Secondary antibodies, all diluted 1:200, were added and allowed to  
53 incubate for 2 hours at room temperature. Sections were washed in PBS then 3-3'-  
54 diaminobenzidine (DAPI, Molecular Probes, D-3571) was added at a 1:50,000 dilution for 10  
55 minutes at room temperature. Slides were imaged using a Nikon Eclipse Ti inverted  
56 epifluorescence microscope equipped with a Photometrics CoolSNAP120 ES2 camera and  
57 images were prepared using Nikon Elements software. Primary antibodies used include:  
58 1:10,000 anti-mouse Mac2 (Accurate Chem., CL8942AP), 1:200 anti-rabbit smooth muscle  
59 myosin heavy chain 11 (Abcam, ab53219), and 1:400 anti-mouse  $\alpha$ -smooth muscle actin-Cy3  
60 (Sigma Aldrich, C6198). Secondary antibodies used include: Alexa Fluor® 647 donkey anti-  
61 rabbit IgG (A31573) and Alexa Fluor® 488 donkey anti-rat IgG (A21208) purchased from Life  
62 Technologies.

63 **Immunocytochemistry** –  $1 \times 10^6$  C57BL/6 BMDMs were seeded on glass coverslips for 2 hours in a 6-  
64 well plate. BMDMs were treated with 25  $\mu\text{g}/\text{mL}$  oxLDL for 4, 24, and 48 hours. Following treatments,  
65 cells were fixed in 4% PFA, washed twice with 1X phosphate buffered saline (PBS), and blocked for 30  
66 minutes in 10% BSA in PBS with 0.1% saponin (BSP). Primary antibodies were diluted and added in  
67 BSP for 2 hours at room temperature. After washing three times with PBS, secondary antibody diluted  
68 1:200 was added in BSP for 2 hours at room temperature. Coverslips were washed again three times  
69 with PBS and then mounted with DAPI slowfade (Invitrogen, S36938). Representative images were  
70 taken on a Leica TCS SP5 Confocal Microscope at 40X magnification with oil immersion.  
71 Representative images are shown as equally enhanced using Image J software. Cells were scored for  
72 nuclear cJun or nuclear p65, and at least 100 cells were counted from at least 3 fields per condition for  
73 each experiment, performed in triplicate. Primary antibodies used included NF- $\kappa\text{B}$  p65 (1:70) (Cell  
74 Signaling, 8242S) and total cJun (1:50) (Thermo Scientific, MA5-15172). Secondary antibody used was  
75 Alexa Fluor® 594 AffiniPure F(ab')<sub>2</sub> Fragment Donkey Anti-Rabbit IgG (Jackson ImmunoResearch, 711-  
76 586-152).

77 **LDL oxidation** – Human LDL (Kalen Biomedical) was oxidized by incubation with copper (II) sulfate  
78 ( $\text{CuSO}_4$ ) as previously described.<sup>6</sup> In short, human LDL was dialyzed in 1X phosphate buffered saline  
79 (PBS) pH 7.6 for 24 hours at room temperature using a 7000 MWCO Slide-A-Lyzer® Dialysis cassette  
80 (Thermo Scientific) to remove EDTA. The buffer was changed to fresh 1X PBS containing 13.8  $\mu\text{M}$   
81  $\text{CuSO}_4$  for an additional 72 hours at room temperature. The cassette was transferred to fresh 1X PBS  
82 containing 50  $\mu\text{M}$  EDTA for 24 hours at 4°C to remove excess copper. Finally, the cassette was  
83 transferred to fresh 1X PBS containing 50  $\mu\text{M}$  EDTA for another 24 hours. Oxidized LDL (oxLDL) was  
84 then collected and stored at 4°C. All steps were performed under sterile conditions. Acetylated LDL  
85 (acLDL) was purchased from Alfa Aesar (J65029 BT-906). This methodology results in oxLDL that  
86 consistently displays a relative electrophoretic mobility between 2 and 3. Relative electrophoretic  
87 mobility of the oxLDL was 3.1 and the acLDL was 3.0.

88 **Limulus Amebocyte Lysate (LAL) Assay** – Oxidized LDL (oxLDL) prepared in the lab and acetylated  
89 LDL (acLDL) purchased from Alfa Aesar (J65029 BT-906) were tested for endotoxin. The Pierce LAL  
90 Chromogenic Endotoxin Quantitation Kit (ThermoFisher) was used as per manufacturers instructions.  
91 OxLDL contained 0.2 endotoxin units (EU) per mg and acLDL contained 0.5 EU per mg.

92 **Generation of bone marrow-derived macrophages** – Murine, bone marrow-derived macrophages  
93 (BMDMs) were generated by flushing the bone marrow from the femurs of male 6- to 8-week-old

94 C57BL/6, lipin-1<sup>mEnzyKO</sup>, or lipin-1<sup>flox/flox</sup> mice with BMDM differentiation medium (KnockOut™  
95 Dulbecco's modified Eagle's medium (DMEM; Gibco, 10829) supplemented with 30% L-cell conditioned  
96 medium, 20% fetal bovine serum (Atlas Biologicals), 2mM L-glutamine (HyClone), 100 U/ml penicillin-  
97 streptomycin (ATCC), 1mM sodium pyruvate (HyClone), and 0.2% sodium bicarbonate). Red blood  
98 cells were removed by ammonium chloride-potassium carbonate lysis. Isolated cells were incubated for  
99 7 days in BMDM differentiation medium at 37°C and 5% CO<sub>2</sub>. BMDMs were collected by removing  
100 medium, washing cells with 1X sterile phosphate buffered saline without Ca<sup>2+</sup> or Mg<sup>2+</sup> (PBS; HyClone)  
101 then incubated with 10 mM EDTA, pH 7.6, in 1X PBS to lift cells from the plate. BMDMs were then  
102 placed into complete DMEM (DMEM (Lonza, 12-741) 10% fetal bovine serum (Atlas Biologicals),  
103 2mM L-glutamine (HyClone), 100 U/ml penicillin-streptomycin (ATCC), and 1mM sodium pyruvate  
104 (HyClone)).

105 **L-cell conditioned medium** – The murine fibroblast cell line L929 (ATCC CCL-1) was grown in RPMI  
106 1640 (Hyclone, SH30027.01) supplemented with 10% FBS (Atlas Biologicals), 2 mM L-glutamine  
107 (Hyclone), 1 mM sodium pyruvate (Hyclone), and 100 U/mL penicillin/streptomycin (ATCC). In short,  
108 3.75x10<sup>5</sup> cells were seeded in a T225 tissue culture flask with 75 mL medium. The flask was incubated  
109 for 12 days at 37°C. Medium was collected, cleared of cell debris by centrifugation, filtered (0.22 µm),  
110 and stored at -80°C until use.

111 **siRNA treatment** – Bone marrow-derived macrophages (BMDMs) were collected in complete DMEM  
112 medium and counted. 5x10<sup>6</sup> BMDMs were transfected using Amaxa™ P3 Primary Cell 4D-  
113 Nucleofector™ X Kit L (Lonza) with 300 pmols of appropriate siRNA. cJun Silencer® Select Pre-  
114 designed siRNA (Ambion® IDs: s68563 and s201552) and Accel™ Control siRNA eGFP siRNA #1  
115 (Thermo Scientific, D-001940-01-20) were used. Cells were seeded in complete DMEM medium  
116 (DMEM (Lonza, 12-741) 10% fetal bovine serum (Atlas Biologicals), 2mM L-glutamine (HyClone), 100  
117 U/ml penicillin-streptomycin (ATCC), and 1mM sodium pyruvate (HyClone)) at a concentration of 8x10<sup>5</sup>  
118 cells/well in a 12-well plate. Cells were incubated at 37°C for 4 hours prior to treatment.

119 **Nile Red Staining** – 1.1x10<sup>6</sup> BMDMs in complete DMEM (DMEM (Lonza, 12-741) 10% fetal bovine  
120 serum (Atlas Biologicals), 2mM L-glutamine (HyClone), 100 U/ml penicillin-streptomycin (ATCC), and  
121 1mM sodium pyruvate (HyClone)) media were placed into a polypropylene flow cytometry tubes (VWR,  
122 60818-500). 50 µg/mL of oxLDL (Alfa Aesar, J65261) was added to the tubes. BMDMs were incubated  
123 with oxLDL for 24 hours. Tubes were spun at 350Xg for 10 minutes. Complete DMEM medium was  
124 removed and BMDMs were fixed in 10% formalin for 20 minutes. BMDMs were then washed in FACS  
125 wash (1X phosphate buffered saline (PBS) with 1% bovine serum albumin and 0.1% sodium azide).  
126 Each sample was split equally in two new polypropylene flow tubes. Unstained tubes were left  
127 untreated and the remaining tubes were spun at 350Xg for 10 minutes and brought back up in 100  
128 ng/mL of Nile Red (Thermo Scientific, N1142) in 1X PBS. After 5 minutes, BMDMs were washed with  
129 1X PBS and reconstituted in 0.5 mL of 1X PBS. Flow cytometry was performed on an LSR II Flow  
130 Cytometer (BD Biosciences).

131 **Inhibitors** – Inhibitors used include 1 µM Gö6976 (EMD Millipore, 365253) and 10 µM U0126 (Sigma  
132 Aldrich, 662005). Inhibitors were added 24 hours after the initial stimulation (with either 25 µg/mL  
133 oxLDL or 10 ng/mL LPS) and cells or supernatants were collected at 48 hours after initial stimulation.

134 **Quantitative Real-Time PCR (qRT-PCR)** – mRNA was extracted from BMDMs with RNA-STAT 60  
135 reagent (Amsbio) per manufacturer's instructions and converted to cDNA using qScript cDNA SuperMix  
136 (Quantabio). qRT-PCR was performed in a Biorad iCycler with SsoAdvanced Universal SYBER Green  
137 SuperMix (BioRad). Primers (Supplemental Table 1) were designed using online Beacon Designer  
138 software. PCR products were verified by the presence of a single peak in melt curve analysis. Results  
139 were normalized to the housekeeping gene, Rpl13a, and expressed as a fold change using the 2<sup>-ΔΔCt</sup>  
140 method.

141 **Tissue processing for Western blot analysis** – Tissues were flash frozen in liquid nitrogen and  
142 stored at -80°C until use. Tissue was lysed in RIPA buffer (150 mM sodium chloride, 1% NP-40, 0.5%  
143 sodium deoxycholate, 0.1% SDS, 50 mM Tris, pH 8, and 1 mM PMSF). Homogenization was  
144 performed using the Biojector® 2000 (iHealthNet). Homogenized tissue was placed on a rotator for 30  
145 minutes at 4°C. Samples were then centrifuged for 5 minutes at 15,000Xg. Resulting pellets were re-  
146 suspended in denaturing lysis buffer (1X NuPage LDS sample buffer containing 100 mM dithiothreitol  
147 (DTT; Life Technologies), 1X protease inhibitor cocktail (Thermo Scientific), 1 X phosphatase inhibitor  
148 cocktail 2 (Sigma Aldrich), and 1X phosphatase inhibitor cocktail 3 (Sigma Aldrich)).

149 **Western blot analysis** – BMDMs were lysed in denaturing lysis buffer (1X NuPage LDS sample buffer  
150 containing 100 mM dithiothreitol (DTT; Life Technologies), 1X protease inhibitor cocktail (Thermo  
151 Scientific), 1X phosphatase inhibitor cocktail 1 (Sigma Aldrich), and 1X phosphatase inhibitor cocktail 3  
152 (Sigma Aldrich)). Protein concentration of BMDM or tissue samples (described above) was determined  
153 by Peirce® 660 nm Protein Assay (Thermo Scientific). 20 µg of total protein for each sample was loaded  
154 onto a 4 to 12% polyacrylamide NuPAGE Novex gel (Invitrogen). MOPS (50 mM 4-  
155 morpholinepropanesulfonic acid, 50 mM Tris base, 0.1% SDS, 1 mM EDTA, pH 7.7) running buffer was  
156 used to run the gel. Proteins were separated at 200V for 55 minutes and semidry transfer (Novex,  
157 SD1000) was performed for 45 minutes at 20 V onto a polyvinylidene difluoride (Immobilon-FL)  
158 membrane (EMD Millipore). The membranes were blocked for 1 hour at room temperature in 10% Li-  
159 Cor blocking buffer (Li-Cor Biosciences) in 1X phosphate buffered saline (PBS). Primary antibodies  
160 were diluted 1:1,000 in 1% BSA in PBS with 0.01% sodium azide, excluding β-actin which was diluted  
161 1:80,000, and were incubated on the membranes overnight at 4°C on a rocker. Secondary antibodies  
162 were diluted 1:2,000 in 5% milk with Tris-buffered saline with 0.1% Tween 20 (TBST) plus 0.01% SDS  
163 and incubated with membranes for 2 hours at room temperature. The membranes were washed three  
164 times, for 15 minutes each, with TBST while rocking after incubation with both primary and secondary  
165 antibodies. ImmunoCruz Western blotting luminol reagent (Santa Cruz, sc-2048) was mixed and added  
166 to blots for 1 minute. Exposures were taken with UltraCruz autoradiography film (Santa Cruz, sc-  
167 201697). Films were scanned and densitometry was performed using Image J analysis software. Bands  
168 of interest were normalized to β-actin or PCNA for statistical analysis. Primary antibodies were as  
169 follows: p38 MAPK (9212S), p-p38 MAPK (4631), SAPK/JNK (9252), p-SAPK/JNK (4668), p44/42  
170 MAPK (9102), p-p44/42 MAPK (4370), p-c-Jun (3270), c-Fos (4384), p-c-Fos (5348), NF-κB p65  
171 (8242), p-PKCα/β II (9375), p-PKCδ (9374), p-PKCθ (9377), PKD/PKCμ (2052), p-PKD/PKCμ (2054),  
172 lipin-1 (14906) (all purchased from Cell Signaling), c-Jun (Thermo Scientific, MA5-15172), PKCδ (sc-  
173 8402) and PCNA (sc-7907) (purchased from Santa Cruz), β-actin (Sigma Aldrich, A2228), and PKCβII  
174 (Abcam, ab38279). Secondary antibodies were as follows: goat anti-rabbit IgG-HRP (sc-2004) and goat  
175 anti-mouse IgG-HRP (sc-2005) (purchased from Santa Cruz).

176 **Cholesterol ester & Glycerolipid Analysis** – Extraction procedure and LC-MS/MS method adapted  
177 with modifications from Hutchins *et. al.*<sup>7</sup>. Cell pellets were thawed on ice, re-suspended in 1 mL PBS  
178 and sonicated for 1 minute. 500 µL of the cell homogenate was transferred to a borosilicate culture tube  
179 and spiked with 300 pmol of internal standards: 1,3(d<sub>5</sub>)-dinonadecanoyl-2-dodecanoyl-glycerol, 1,3(d<sub>5</sub>)-  
180 dinonadecanoyl-glycerol, 17:0 cholest-5-en-3β-yl heptadecanoate (Avanti® Polar Lipids, Inc). Samples  
181 were extracted with 2 mL of 75:25 (v/v) isooctane-ethyl acetate. The phases were separated by  
182 centrifugation (7 min, 1000 x g), and the organic layer was transferred to a clean borosilicate tube. The  
183 sample was then extracted further with another 2 mL of 75:25 (v/v) isooctane-ethyl acetate. Combined  
184 organic fractions were evaporated on a vacuum centrifuge. The residue was reconstituted in 100 µL of  
185 4.5% methyl tert-butyl ether (MTBE) in hexane and transferred to a new vial for analysis. Vials were  
186 immediately placed in cooled (4°C) autosampler. Separation by normal phase high performance liquid  
187 chromatography (HPLC) was performed by loading 10 µL of each sample onto a 150 x 2 mm, 3 micron,  
188 Phenomenex Luna® silica column fitted with a 2.1 mm 2 µm assay frit. Lipid classes were separated by  
189 a 0.3 mL/min gradient of MTBE in hexane over 11 minutes. 4.5% MTBE was isocratic from 0 to 3

190 minutes; from 3 to 7.5 minutes MTBE was ramped to 45% where it was held until 9.5 minutes. MTBE  
191 was returned to 4.5% from 9.5 to 10 minutes where it remained until the end of the run at 11 minutes.  
192 Before entry into the mass spectrometer, the eluent was modified via a mixing tee by the addition of 0.2  
193 mL/min of an electrospray solvent containing 10 mM ammonium acetate in 45:45:5:5 (v/v/v/v),  
194 isopropanol-acetonitrile-water-dichloromethane delivered by a third HPLC pump (shimadzu LC-10AD).  
195 Online LC-ESI MS/MS was performed on a QTRAP 6500 hybrid quadrupole/linear ion-trap mass  
196 spectrometer (AB Sciex). The relative abundance of glycerolipid species was monitored by neutral loss  
197 mass spectrometry. The instrument was operated in positive ion mode with an ion spray voltage of  
198 5500 V. Neutral losses ( $[M+NH_4]^+$ ) of  $m/z$  245 (14:0), 271 (16:1), 273 (16:0), 295 (18:3), 297 (18:2), 299  
199 (18:1), 301 (18:0), 319 (20:5), 321 (20:4), were monitored using full scans over  $m/z$  550 to  $m/z$  1,000  
200 collected every 2.4 seconds from 1.5 minutes to the end of the run at 11 minutes. Detection of  
201 cholesterol ester species was accomplished by using precursor ion scans in positive ion mode every  
202 620 ms from 0-1.5 minutes with a product mass of  $m/z$  369,  $[M+NH_4]^+$ . Qualitative abundance of lipid  
203 species was determined using MultiQuant 2.1 software (Sciex). LC-MS/MS was conducted in the LIPID  
204 MAPS mass spectrometry facility in the Department of Pharmacology at the University of California San  
205 Diego, La Jolla, CA.

206 **ELISA Immunoassay Analysis** – TNF- $\alpha$  was measured using a commercially available Mouse TNF  
207 alpha ELISA Ready-SET-Go!<sup>®</sup> kit (Affymetrix eBioscience) according to the manufacturer's instructions.

208 **Isolation and Staining of Splenocytes** – Spleens were homogenized in FACS wash buffer (1%  
209 bovine serum albumin, 1 mM EDTA, and 0.1% sodium azide in phosphate buffered saline). The  
210 spleens were strained with a 40  $\mu$ m cell strainer (Falcon, 352340) followed by centrifugation at 300Xg  
211 for 5 minutes. The supernatant was decanted and cells were dislodged in 3 mLs of ACK lysis buffer  
212 (0.15 M  $NH_4Cl$ , 10 mM  $KHCO_3$ , 0.1 mM  $NA_2EDTA$ , adjusted to pH 7.2 and filter sterilized in 0.22  $\mu$ m  
213 filter). Cells were incubated on ice for 5 minutes. Cells were washed in FACS wash buffer with  
214 centrifugation. The pellet was re-suspended in 10 mLs RPMI 1640 (HyClone, SH30027.01), strained  
215 (Falcon, 352340), and counted. Cells were adjusted to  $5 \times 10^6$  cells/mL in RPMI. 100  $\mu$ L of cells were  
216 mixed with 100  $\mu$ L of blocking buffer (CD16/32 diluted in FACS wash buffer) and incubated at 4°C for  
217 20 minutes. Cells were centrifuged at 1,500 rpm for 5 minutes and the supernatant was discarded.  
218 Primary labeled antibodies (50  $\mu$ L per well) were added, light protected, and incubated at 4°C for 30  
219 minutes. Cells were washed 3 times in FACS wash buffer with centrifugation. Cells were re-suspended  
220 in cold FACS/fix solution (FACS wash buffer with 0.1% formaldehyde), light protected, and incubated  
221 for 30 minutes at 4°C. Cells were washed in FACS wash buffer with centrifugation then cells were  
222 transferred to tubes in 500  $\mu$ L FACS wash buffer. Flow cytometric analysis was performed on a BD  
223 LSR II (San Jose, CA). Antibodies used include: 1:800 CD11cBV786 (563735), 1:50 CD45.2 BV605  
224 (56305), 1:1,000 CD3 PerCP (561089), and 1:800 Ly6G Fitc (551460) purchased from BD Biosciences,  
225 and 1:4,000 CD4 e450 (48-0041-80), 1:2,000 CD8 APCe780 (47-0081-80), 1:400 NK1.1 APCe (17-  
226 5941-63), 1:4,000 CD11b PECy7 (15-0112-81), 1:4,000 CD19 Pee610 (61-0193-80), 1:4,000 Ly6C PE  
227 (12-5932-80) and 1:200 CD16/CD32 (16-0161-81) purchased from eBioscience.

228 **Statistical analysis** – GraphPad Prism 5.0 (La Jolla, CA) was used for statistical analyses. Student T-  
229 Test analysis was used for comparison between two data sets (FIG 1D). All other statistical significance  
230 was determined using a one-way ANOVA analysis of variance with a Dunnett's post-test,  $P \leq 0.05$ .

231

232

**SUPPLEMENTAL REFERENCES**

- 234 1. Bjørklund MM, Hollensen AK, Hagensen MK, Dagnæs-Hansen F, Christoffersen C, Mikkelsen JG, Bentzon  
235 JF. Induction of atherosclerosis in mice and hamsters without germline genetic engineering novelty and  
236 significance. *Circulation Research*. 2014;114:1684-1689
- 237 2. Klein RL, Dayton RD, Tatom JB, Henderson KM, Henning PP. Aav8, 9, rh10, rh43 vector gene transfer in  
238 the rat brain: Effects of serotype, promoter and purification method. *Mol Ther*. 2008;16:89-96
- 239 3. Gao G, Vandenberghe LH, Alvira MR, Lu Y, Calcedo R, Zhou X, Wilson JM. Clades of adeno-associated  
240 viruses are widely disseminated in human tissues. *J Virol*. 2004;78:6381-6388
- 241 4. Mitra MS, Chen Z, Ren H, Harris TE, Chambers KT, Hall AM, Nadra K, Klein S, Chrast R, Su X, Morris AJ, Finck  
242 BN. Mice with an adipocyte-specific lipin 1 separation-of-function allele reveal unexpected roles for  
243 phosphatidic acid in metabolic regulation. *Proc Natl Acad Sci U S A*. 2013;110:642-647
- 244 5. Nadra K, de Preux Charles AS, Médard JJ, Hendriks WT, Han GS, Grès S, Carman GM, Saulnier-Blache JS,  
245 Verheijen MH, Chrast R. Phosphatidic acid mediates demyelination in lpin1 mutant mice. *Genes Dev*.  
246 2008;22:1647-1661
- 247 6. Yurdagul A, Green J, Albert P, McInnis MC, Mazar AP, Orr AW. A5β1 integrin signaling mediates oxidized  
248 ldl-induced inflammation and early atherosclerosis. *Arterioscler Thromb Vasc Biol*. 2014;34:1362-1373
- 249 7. Hutchins PM, Barkley RM, Murphy RC. Separation of cellular nonpolar neutral lipids by normal-phase  
250 chromatography and analysis by electrospray ionization mass spectrometry. *Journal of Lipid Research*.  
251 2008;49:804-813
